# Supplementary material for: Connecting the Greenland ice-core and U∕Th timescales via cosmogenic radionuclides: testing the synchroneity of Dansgaard–Oeschger events
Source: Copernicus journal article supplement (doi:10.5194/cp-14-1755-2018), 2018-11-20
Supplement: Supplementary file 1 [file cp-14-1755-2018-supplement.zip]

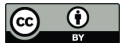

## *Supplement of*

# **Connecting the Greenland ice-core and U / Th timescales via cosmogenic radionuclides: testing the synchronicity of Dansgaard–Oeschger events**

**Florian Adolphi et al.**

*Correspondence to:* Florian Adolphi ([adolphi@climate.unibe.ch](mailto:adolphi@climate.unibe.ch))

- [cp-14-1755-2018-supplement-title-page.pdf](#)
- [Adolphi\\_CP2018\\_SI.txt](#)

The copyright of individual parts of the supplement might differ from the CC BY 4.0 License.
